# Supplementary material
Source: Springer Nature journal article supplement (https://www.springermedizin.de/resource/supplementary/12936_2014_3711_MOESM3_ESM.pdf/9545182)

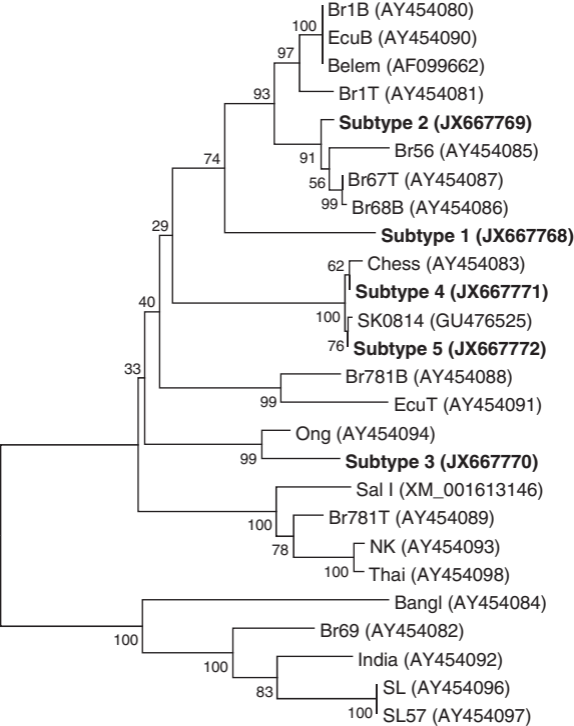

0.05

Supplement: MOESM3 [file 9545182]
